# Supplementary material for: Consumption of a high energy density diet triggers microbiota dysbiosis, hepatic lipidosis, and microglia activation in the nucleus of the solitary tract in rats
Source: PubMed Central journal article supplement (PMC7283362; doi:10.1038/s41387-020-0119-4), 2020-06-09
Supplement: 41387_2020_119_MOESM1_ESM.pdf [file 41387_2020_119_MOESM1_ESM.pdf]

**A)**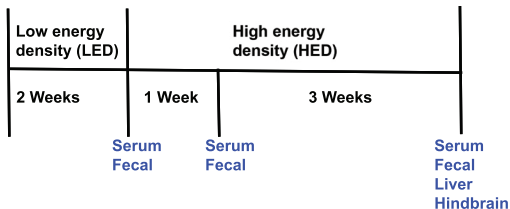**Short-term HED  
(ST-HED)****B)**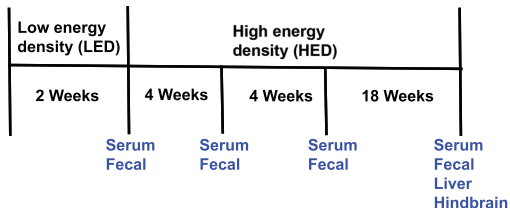**Long-term HED  
(LT-HED)****C)**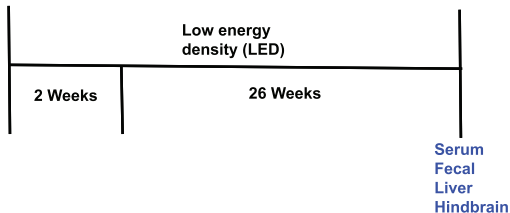**Long-term LED  
(LED26)**
